# Supplementary material for: Methods to coalesce fluorinated Pickering emulsions
Source: Royal Society of Chemistry journal article supplement (doi:10.1039/c7ay01289f), 2017-01-01

## Supporting Information

### Methods to Coalesce Fluorinated Pickering Emulsions

Ming Pan<sup>1†</sup>, Fengjiao Lyu<sup>2†</sup> and Sindy K. Y. Tang<sup>2\*</sup>

<sup>†</sup>Equal Contributions

<sup>1</sup>Department of Materials Science and Engineering, Stanford University

<sup>2</sup>Department of Mechanical Engineering, Stanford University

Email: [sindy@stanford.edu](mailto:sindy@stanford.edu)

**Figure S1.** NP coverage on drops that were merged using different methods. SEM image of merged drop after drying on a Si wafer at (a, c, e, g) low and (b, d, f, h) high magnifications, respectively. The drops were stabilized by 200 nm F-SiO<sub>2</sub> NPs before merging and they were merged by (a-b) centrifugation, (c-d) freezing and thawing, (e-f) PFO addition, and (g-h) electric field, respectively.

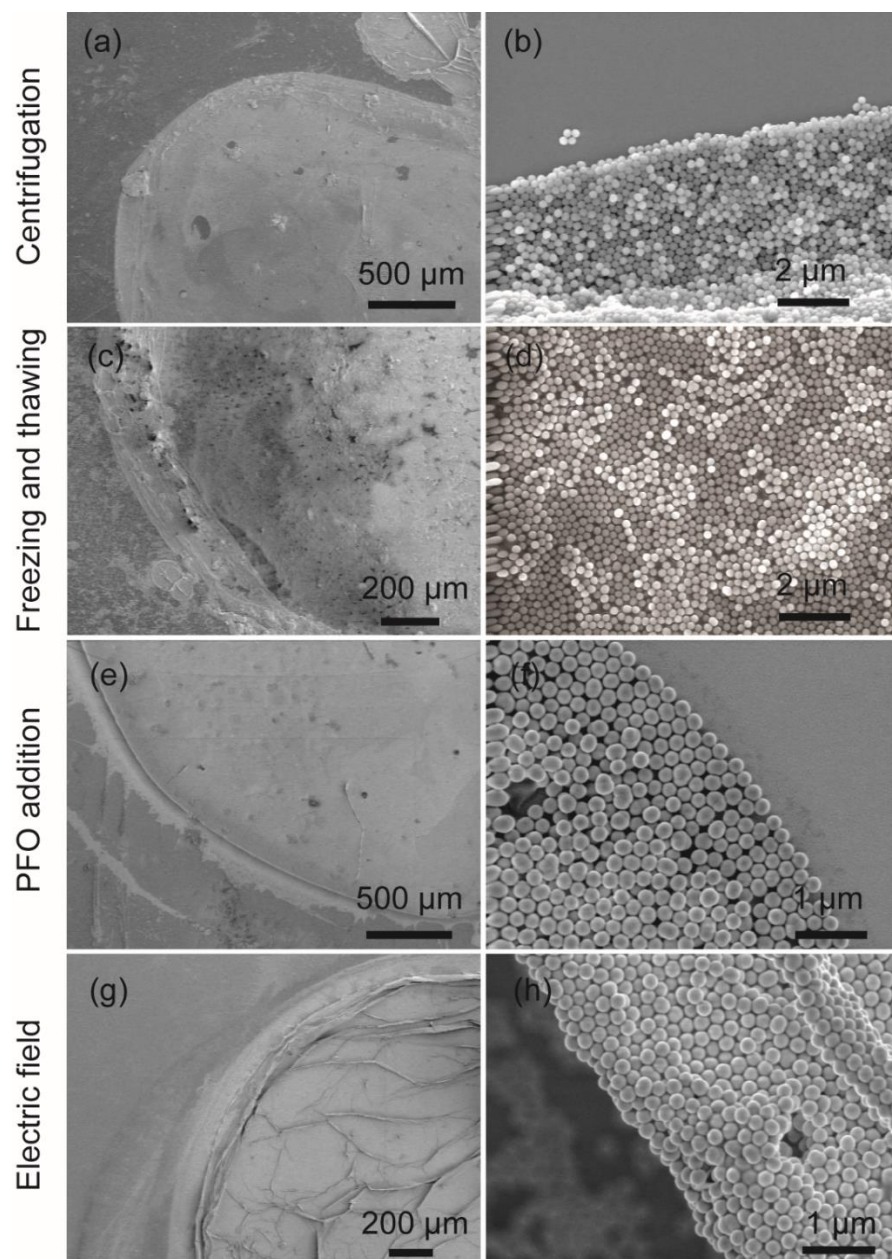

**Figure S2.** Optical image showing DI water drops stabilized by 200 nm F-SiO<sub>2</sub> NPs (a) before and (b) after heating at 90 °C for 30 minutes. There was no significant change in drop size distribution after heating, indicating their high stability.

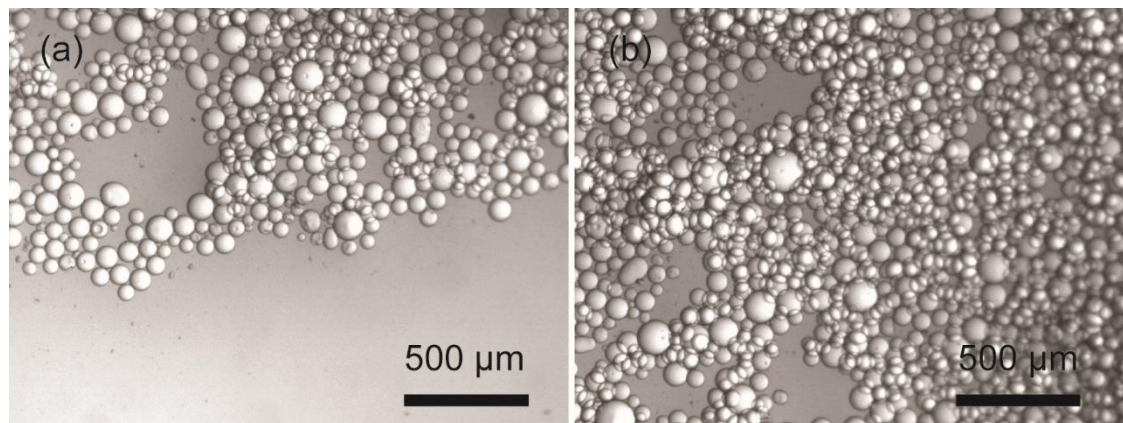

**Figure S3.** (a) Optical image of the drop after shaking a mixture of water in F-SiO<sub>2</sub> NPs in a mixture of HFE-7500 and PFO ( $V_{\text{HFE}}:V_{\text{PFO}} = 1:3$ ,  $V_{\text{H}_2\text{O}}:V_{\text{NPs in HFE/PFO}} = 1:5$ ). (b) Optical image of the drop after shaking a mixture of water, HFE-7500 and PFO ( $V_{\text{H}_2\text{O}}:V_{\text{HFE}}:V_{\text{PFO}} = 2:5:5$ ) without any NPs. (c) Optical image of the drop after shaking a mixture of water in F-SiO<sub>2</sub> NPs dispersed in PFO ( $V_{\text{H}_2\text{O}}:V_{\text{NPs in PFO}} = 1:5$ ).

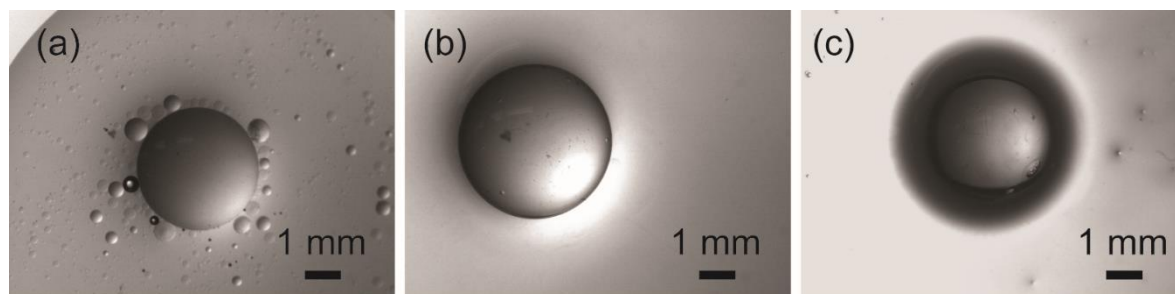

**Figure S4.** NPs coverage on the bulk aqueous phase after the shaking a mixture of 5% 200 nm F-SiO<sub>2</sub> NPs in PFO and DI water ( $V_{\text{NPs in PFO}}:V_{\text{water}}=5:1$ ). The fluororous phase was replaced with neat PFO before transferring the aqueous phase onto a Si wafer. (a-b) SEM image of aqueous phase after drying on a Si wafer at (a) low and (b) high magnifications, respectively. Despite poor emulsion stability of water in PFO, NPs coverage on the water-PFO interface was still observed.

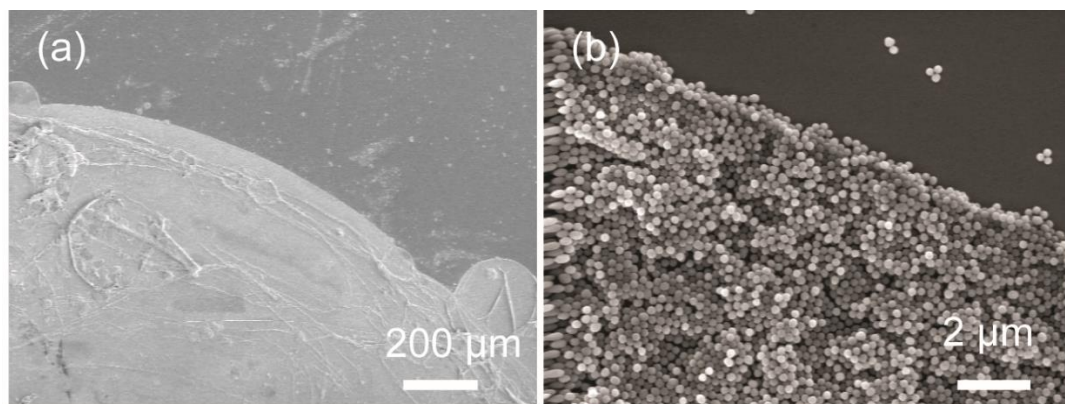

Supplement: c7ay01289f1.pdf [file c7ay01289f1.pdf]
